# Supplementary material
Source: MDPI journal article supplement (https://www.mdpi.com/2073-4352/10/11/1040)
Supplement: s1 [file s1]

Article

# Microwave-Assisted Vs. Conventional Hydrothermal Synthesis of MoS<sub>2</sub> Nanosheets: Application towards Hydrogen Evolution Reaction

Getachew Solomon <sup>1</sup>, Raffaello Mazzaro <sup>2</sup>, Vittorio Morandi <sup>2</sup>, Isabella Concina <sup>1</sup> and Alberto Vomiero <sup>1,\*</sup>

<sup>1</sup> Division of Materials Science, Department of Engineering Science and Mathematics, Luleå University of Technology, 971 87 Luleå, Sweden; getachew.solomon@ltu.se (G.S.); isabella.concina@ltu.se (I.C.)

<sup>2</sup> CNR-Institute of Microelectronics and Microsystem (IMM), Section of Bologna Via Piero Gobetti 101, 40129 Bologna, Italy; mazzaro@bo.imm.cnr.it (R.M.); morandi@bo.imm.cnr.it (V.M.)

\* Correspondence: alberto.vomiero@ltu.se

Received: 16 October 2020; Accepted: 10 November 2020; Published: date

## Electronic supplementary information

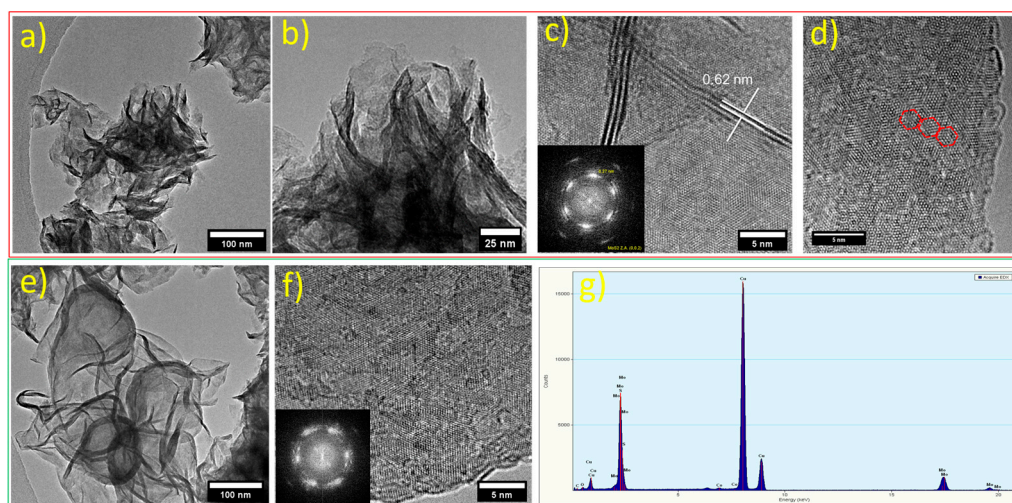

**Figure S1.** HR-TEM micrographs of HT-MoS<sub>2</sub> (a–d), MW-MoS<sub>2</sub> (e,f), EDX spectrum confirming the presence of all elements (g).

**Author Contributions:** Data curation, Draft preparation, and formal analysis G. S., TEM analysis, R.M., Investigation, A.V., I. C., V. M., Writing & editing, G.S. and A.V. All authors have read and agreed to the published version of the manuscript.

**Funding:** This work was funded by financial support from Knut & Alice Wallenberg foundation, the Swedish foundation consolidator fellowship, the European Union's Horizon 2020 research and innovation program under grant agreement No 654002, Luleå University of Technology laboratory fund program, and Kempe Foundation for partial funding. VINNOVA under the VINNMER Marie Curie incoming Grant for partial funding (project "Light Energy", LiEN, 2015-01513). The European Union's Horizon 2020 research and innovation program under GrapheneCore2 785219 – Graphene Flagship for partial funding.

**Conflicts of Interest:** The authors declare no conflict of interest.

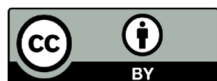

© 2020 by the authors. Submitted for possible open access publication under the terms and conditions of the Creative Commons Attribution (CC BY) license (<http://creativecommons.org/licenses/by/4.0/>).
